# Supplementary material
Source: publisher site journal article supplement (https://www.dovepress.com/article/437714)
Supplement: Supplementary file 1 [file get_supplementary_file.php]

## Supplementary tables

**Supplementary Table 1. List of TaqMan assay IDs (Applied Biosystems) for quantitative RT-PCR**

| Gene name | TaqMan assay ID |
|-----------|-----------------|
| ACTB      | Hs01060665_g1   |
| AGRN      | Hs00394748_m1   |
| BGN       | Hs00959143_m1   |
| CD44      | Hs01075861_m1   |
| COL1A2    | Hs01028956_m1   |
| COL5A1    | Hs00609088_m1   |
| COL5A2    | Hs00893878_m1   |
| ELN       | Hs00355783_m1   |
| NOS3      | Hs01574659_m1   |
| FBN1      | Hs00171191_m1   |
| HAPLN3    | Hs00820260_m1   |
| HYLA2     | Hs00186841_m1   |
| RPL19     | Hs02338565_gH   |
| TBP       | Hs00427620_m1   |

**Supplementary Table 2. List of primary antibodies for immuno-TEM**

| Antibody      | Supplier & cat. no.     | Host                       | Dilution | Immunogen                                                                                                      |
|---------------|-------------------------|----------------------------|----------|----------------------------------------------------------------------------------------------------------------|
| <b>COL1A2</b> | Abcam<br>ab96723        | Rabbit<br>polyclonal       | EM: 1:25 | Recombinant protein fragment corresponding to a region within amino acids 1057 and 1339 of COL1A2 (NP_000080). |
| <b>COL5A2</b> | Invitrogen<br>PA5-38880 | Rabbit / IgG<br>polyclonal | EM: 1:25 | A synthetic peptide derived from the internal region of human Collagen V alpha2.                               |

**Supplementary Table 3. List of ECM genes included in gene expression analysis**

| Gene     | Mean LSS | Mean Static | Difference | SE difference | P value | q value | >8% FDR |
|----------|----------|-------------|------------|---------------|---------|---------|---------|
| ACAN     | 3.71     | 2.74        | 0.96       | 1.11          | 0.43    | 0.67    | No      |
| ADAMTS1  | 10.03    | 8.55        | 1.47       | 0.28          | 0.01    | 0.05    | Yes     |
| ADAMTS15 | 3.61     | 1.83        | 1.78       | 0.43          | 0.01    | 0.08    | Yes     |
| ADAMTS18 | 7.75     | 5.44        | 2.31       | 0.28          | 0       | 0.02    | Yes     |
| ADAMTS3  | 1.96     | 2.02        | -0.06      | 0.51          | 0.91    | 0.88    | No      |
| ADAMTS4  | 8.77     | 9.62        | -0.85      | 0.21          | 0.02    | 0.09    | No      |
| AGRN     | 11.5     | 10.15       | 1.35       | 0.13          | 0       | 0.01    | Yes     |
| ARSA     | 9.7      | 9.42        | 0.29       | 0.11          | 0.06    | 0.21    | No      |
| ARSB     | 3.28     | 3.84        | -0.56      | 0.7           | 0.47    | 0.67    | No      |
| ARSD     | 7.27     | 6.6         | 0.67       | 0.18          | 0.02    | 0.1     | No      |
| ARSE     | 6.22     | 5.29        | 0.93       | 0.26          | 0.02    | 0.11    | No      |
| ARSG     | 3.33     | 3.73        | -0.4       | 0.42          | 0.39    | 0.66    | No      |
| ARSI     | 2.98     | 3.53        | -0.55      | 0.67          | 0.45    | 0.67    | No      |
| ARSJ     | 3.15     | 2.94        | 0.2        | 0.77          | 0.81    | 0.84    | No      |
| ARSK     | 5.97     | 6.14        | -0.17      | 0.49          | 0.74    | 0.82    | No      |
| ASPN     | 2.31     | 1.34        | 0.97       | 0.74          | 0.26    | 0.56    | No      |

|            |       |       |       |      |      |      |     |
|------------|-------|-------|-------|------|------|------|-----|
| B3GALT1    | 2.18  | 1.78  | 0.4   | 1.16 | 0.75 | 0.82 | No  |
| B3GALT4    | 7.78  | 6.72  | 1.06  | 0.32 | 0.03 | 0.13 | No  |
| B3GALT6    | 9.54  | 10.08 | -0.55 | 0.1  | 0    | 0.04 | Yes |
| B3GAT1     | 4.54  | 4.24  | 0.3   | 0.32 | 0.4  | 0.66 | No  |
| B3GAT2     | 3.82  | 3.57  | 0.25  | 0.71 | 0.74 | 0.82 | No  |
| B3GLCT     | 6.85  | 6.28  | 0.57  | 0.28 | 0.11 | 0.34 | No  |
| B3GNT2     | 8.32  | 7.78  | 0.54  | 0.17 | 0.03 | 0.14 | No  |
| B3GNT3     | 3.42  | 1.75  | 1.67  | 0.81 | 0.11 | 0.33 | No  |
| B3GNT4     | 3.03  | 3.09  | -0.06 | 0.57 | 0.92 | 0.88 | No  |
| B3GNT7     | 3.83  | 3.27  | 0.56  | 1.16 | 0.65 | 0.78 | No  |
| B4GALT4    | 2.12  | 1.83  | 0.3   | 0.53 | 0.61 | 0.75 | No  |
| B4GALT7    | 6.56  | 6.77  | -0.21 | 0.23 | 0.4  | 0.66 | No  |
| BCAN       | 2.48  | 2.68  | -0.2  | 0.61 | 0.76 | 0.82 | No  |
| BGN        | 15.6  | 14.55 | 1.05  | 0.08 | 0    | 0.01 | Yes |
| CD44       | 4.41  | 5.75  | -1.34 | 0.26 | 0.01 | 0.05 | Yes |
| CHAD       | 2.89  | 2.84  | 0.06  | 0.7  | 0.94 | 0.89 | No  |
| CHADL      | 3.84  | 2.97  | 0.87  | 0.67 | 0.26 | 0.56 | No  |
| CHPF       | 4.47  | 4.91  | -0.44 | 0.16 | 0.05 | 0.2  | No  |
| CHPF2      | 10.79 | 9.95  | 0.83  | 0.23 | 0.02 | 0.11 | No  |
| CHST1      | 3.05  | 3.61  | -0.55 | 0.53 | 0.36 | 0.64 | No  |
| CHST10     | 8.48  | 8.38  | 0.11  | 0.15 | 0.51 | 0.71 | No  |
| CHST11     | 5.18  | 4.72  | 0.46  | 0.4  | 0.31 | 0.6  | No  |
| CHST12     | 9.78  | 9.29  | 0.49  | 0.18 | 0.05 | 0.2  | No  |
| CHST13     | 10.5  | 10.53 | -0.03 | 0.27 | 0.91 | 0.88 | No  |
| CHST14     | 9.95  | 9.99  | -0.04 | 0.11 | 0.71 | 0.82 | No  |
| CHST15     | 7.66  | 7.43  | 0.24  | 0.12 | 0.12 | 0.35 | No  |
| CHST2      | 6.79  | 6.28  | 0.51  | 0.51 | 0.37 | 0.66 | No  |
| CHST3      | 8.93  | 8.15  | 0.78  | 0.21 | 0.02 | 0.1  | No  |
| CHST4      | 3.09  | 2.52  | 0.57  | 0.28 | 0.11 | 0.33 | No  |
| CHST5      | 1.69  | 1.74  | -0.05 | 0.41 | 0.91 | 0.88 | No  |
| CHST6      | 2.09  | 2.23  | -0.14 | 0.87 | 0.88 | 0.87 | No  |
| CHST7      | 5.32  | 6.72  | -1.4  | 0.2  | 0    | 0.03 | Yes |
| CHST9      | 1.21  | 1.74  | -0.53 | 0.33 | 0.18 | 0.5  | No  |
| CHSY1      | 9.76  | 9.65  | 0.11  | 0.05 | 0.1  | 0.33 | No  |
| CHSY3      | 4.57  | 4.85  | -0.29 | 0.36 | 0.47 | 0.67 | No  |
| COL12A1    | 10.1  | 9.92  | 0.18  | 0.1  | 0.14 | 0.41 | No  |
| COL13A1    | 7.58  | 7.89  | -0.31 | 0.32 | 0.38 | 0.66 | No  |
| COL14A1    | 6.3   | 6.4   | -0.1  | 0.31 | 0.76 | 0.82 | No  |
| COL15A1    | 6.82  | 7.28  | -0.46 | 0.34 | 0.25 | 0.56 | No  |
| COL18A1    | 12.34 | 12.22 | 0.11  | 0.13 | 0.43 | 0.67 | No  |
| COL1A2     | 6.92  | 2.09  | 4.83  | 0.3  | 0    | 0    | Yes |
| COL5A1     | 11.06 | 10.32 | 0.74  | 0.17 | 0.01 | 0.07 | Yes |
| COL5A2     | 10.47 | 9.55  | 0.92  | 0.14 | 0    | 0.03 | Yes |
| COL6A1     | 10.32 | 10.6  | -0.28 | 0.35 | 0.47 | 0.67 | No  |
| COL9A1     | 2.38  | 1.9   | 0.48  | 0.52 | 0.4  | 0.66 | No  |
| COL9A2     | 5.7   | 5.64  | 0.06  | 0.28 | 0.84 | 0.85 | No  |
| COL9A3     | 4.93  | 3.59  | 1.34  | 0.37 | 0.02 | 0.11 | No  |
| CSGALNACT1 | 4.05  | 4.67  | -0.62 | 0.49 | 0.27 | 0.56 | No  |
| CSGALNACT2 | 4.64  | 5.15  | -0.51 | 0.29 | 0.15 | 0.43 | No  |
| CSPG4      | 2.09  | 2.45  | -0.36 | 0.49 | 0.5  | 0.7  | No  |
| DCN        | 3.29  | 3.41  | -0.12 | 0.86 | 0.9  | 0.88 | No  |
| DSE        | 8.03  | 8.62  | -0.58 | 0.22 | 0.06 | 0.21 | No  |

|          |       |       |       |      |      |      |     |
|----------|-------|-------|-------|------|------|------|-----|
| DSEL     | 6.01  | 5.2   | 0.81  | 0.38 | 0.1  | 0.33 | No  |
| ECM2     | 2.17  | 1.92  | 0.26  | 0.79 | 0.76 | 0.82 | No  |
| ELN      | 10.22 | 5.43  | 4.79  | 0.27 | 0    | 0    | Yes |
| EPYC     | 1.04  | 1.08  | -0.04 | 0.07 | 0.57 | 0.75 | No  |
| ESM1     | 5.13  | 4.77  | 0.36  | 0.58 | 0.56 | 0.75 | No  |
| EXT1     | 9.84  | 9.93  | -0.1  | 0.17 | 0.6  | 0.75 | No  |
| EXT2     | 9.04  | 8.5   | 0.54  | 0.13 | 0.01 | 0.08 | Yes |
| EXTL1    | 5.04  | 5     | 0.04  | 0.29 | 0.88 | 0.88 | No  |
| EXTL2    | 7.25  | 7.08  | 0.17  | 0.15 | 0.3  | 0.59 | No  |
| EXTL3    | 9.56  | 9.61  | -0.05 | 0.04 | 0.25 | 0.56 | No  |
| FAM20B   | 7.46  | 7.55  | -0.09 | 0.42 | 0.84 | 0.85 | No  |
| FBLN2    | 7.93  | 3.13  | 4.81  | 0.4  | 0    | 0.01 | Yes |
| FBN1     | 9.55  | 6.46  | 3.1   | 0.49 | 0    | 0.03 | Yes |
| FMOD     | 3.81  | 1.44  | 2.37  | 0.53 | 0.01 | 0.07 | Yes |
| FRAS1    | 5.53  | 5.39  | 0.14  | 0.44 | 0.77 | 0.82 | No  |
| FUT8     | 6.56  | 6.9   | -0.33 | 0.26 | 0.27 | 0.56 | No  |
| GALNS    | 10.39 | 10.69 | -0.3  | 0.36 | 0.46 | 0.67 | No  |
| GLB1     | 10.1  | 9.88  | 0.22  | 0.14 | 0.19 | 0.5  | No  |
| GLB1L2   | 3.22  | 4.4   | -1.18 | 0.7  | 0.17 | 0.46 | No  |
| GLB1L3   | 2.18  | 2.9   | -0.73 | 0.67 | 0.34 | 0.63 | No  |
| GLCE     | 9.23  | 8.67  | 0.56  | 0.2  | 0.05 | 0.2  | No  |
| GNS      | 10.66 | 10.84 | -0.18 | 0.05 | 0.03 | 0.12 | No  |
| GPC1     | 10.69 | 10.8  | -0.11 | 0.27 | 0.71 | 0.82 | No  |
| GPC2     | 3.98  | 5.67  | -1.69 | 0.3  | 0    | 0.04 | Yes |
| GPC3     | 4.3   | 4.61  | -0.31 | 0.66 | 0.67 | 0.79 | No  |
| GPC4     | 4.1   | 4.29  | -0.2  | 0.52 | 0.73 | 0.82 | No  |
| GPC5     | 6.04  | 5.04  | 1     | 0.37 | 0.05 | 0.2  | No  |
| GPC6     | 1.38  | 1.09  | 0.29  | 0.22 | 0.26 | 0.56 | No  |
| GUSB     | 9.37  | 9.65  | -0.28 | 0.05 | 0.01 | 0.05 | Yes |
| HAPLN1   | 2.03  | 2.2   | -0.16 | 0.29 | 0.6  | 0.75 | No  |
| HAPLN2   | 5.99  | 6.18  | -0.2  | 0.17 | 0.32 | 0.61 | No  |
| HAPLN2   | 9.88  | 10.14 | -0.26 | 0.33 | 0.47 | 0.67 | No  |
| HAPLN3   | 11.34 | 9.39  | 1.95  | 0.08 | 0    | 0    | Yes |
| HAPLN4   | 5.39  | 5.4   | -0.01 | 0.34 | 0.97 | 0.91 | No  |
| HAS1     | 1.54  | 1.65  | -0.11 | 0.09 | 0.31 | 0.6  | No  |
| HAS2     | 2.74  | 2.17  | 0.57  | 0.64 | 0.42 | 0.67 | No  |
| HAS3     | 3.3   | 2.87  | 0.42  | 0.47 | 0.42 | 0.67 | No  |
| HEXA     | 9.34  | 9.43  | -0.09 | 0.1  | 0.41 | 0.66 | No  |
| HEXB     | 10.1  | 10.05 | 0.06  | 0.19 | 0.79 | 0.84 | No  |
| HEXDC    | 8.14  | 8.09  | 0.05  | 0.11 | 0.66 | 0.79 | No  |
| HGSNAT   | 6.01  | 6.04  | -0.03 | 0.26 | 0.91 | 0.88 | No  |
| HMMR     | 7.71  | 8.74  | -1.03 | 0.24 | 0.01 | 0.07 | Yes |
| HPSE     | 4.13  | 3.82  | 0.31  | 0.59 | 0.63 | 0.76 | No  |
| HPSE2    | 4.23  | 4.15  | 0.08  | 0.85 | 0.93 | 0.89 | No  |
| HS2ST1   | 6.8   | 6.24  | 0.55  | 0.61 | 0.42 | 0.67 | No  |
| HS3ST1   | 6.05  | 5.4   | 0.65  | 0.15 | 0.01 | 0.07 | Yes |
| HS3ST2   | 1.61  | 2.78  | -1.17 | 0.2  | 0    | 0.04 | Yes |
| HS3ST3B1 | 2.13  | 1.44  | 0.69  | 0.81 | 0.44 | 0.67 | No  |
| HS3ST4   | 2.47  | 3.29  | -0.82 | 0.46 | 0.15 | 0.43 | No  |
| HS3ST5   | 4.34  | 4.65  | -0.3  | 0.33 | 0.41 | 0.67 | No  |
| HS3ST6   | 5.03  | 4.75  | 0.28  | 0.42 | 0.54 | 0.73 | No  |
| HS6ST1   | 7.57  | 6.66  | 0.91  | 0.05 | 0    | 0    | Yes |

|           |       |       |       |      |      |      |     |
|-----------|-------|-------|-------|------|------|------|-----|
| HS6ST2    | 4.81  | 5.49  | -0.68 | 0.43 | 0.19 | 0.5  | No  |
| HSPG2     | 8.64  | 8.91  | -0.27 | 0.36 | 0.5  | 0.7  | No  |
| HYAL1     | 8.08  | 8.41  | -0.33 | 0.3  | 0.33 | 0.61 | No  |
| HYAL2     | 13.34 | 12.33 | 1.01  | 0.13 | 0    | 0.02 | Yes |
| HYAL3     | 6.29  | 5.84  | 0.45  | 0.17 | 0.06 | 0.21 | No  |
| HYAL4     | 1.32  | 1.98  | -0.66 | 0.51 | 0.27 | 0.56 | No  |
| IDS       | 6.59  | 7.02  | -0.44 | 0.3  | 0.22 | 0.53 | No  |
| IDUA      | 7.2   | 6.88  | 0.32  | 0.15 | 0.1  | 0.32 | No  |
| IMMP1L    | 5     | 5.23  | -0.23 | 0.15 | 0.21 | 0.52 | No  |
| IMPG1     | 1.78  | 2.08  | -0.31 | 0.51 | 0.58 | 0.75 | No  |
| IMPG2     | 2.06  | 2.42  | -0.37 | 0.45 | 0.47 | 0.67 | No  |
| ITGA1     | 3.85  | 3.14  | 0.71  | 0.45 | 0.19 | 0.5  | No  |
| ITGA2     | 9.07  | 9.49  | -0.42 | 0.13 | 0.03 | 0.14 | No  |
| ITGA5     | 12.02 | 12.39 | -0.37 | 0.1  | 0.02 | 0.1  | No  |
| ITGB1     | 13.1  | 13.24 | -0.14 | 0.26 | 0.61 | 0.75 | No  |
| ITGB1BP1  | 11.11 | 10.99 | 0.12  | 0.19 | 0.57 | 0.75 | No  |
| KERA      | 2.88  | 2.79  | 0.09  | 0.99 | 0.93 | 0.89 | No  |
| LUM       | 3.44  | 3.67  | -0.22 | 0.86 | 0.81 | 0.84 | No  |
| MATN2     | 8.51  | 2.57  | 5.94  | 0.18 | 0    | 0    | Yes |
| MMP1      | 12.37 | 10.22 | 2.15  | 0.78 | 0.05 | 0.2  | No  |
| MMP10     | 5.56  | 5.29  | 0.27  | 0.49 | 0.61 | 0.75 | No  |
| MMP12     | 1.73  | 2.39  | -0.66 | 0.43 | 0.2  | 0.51 | No  |
| MMP13     | 1.38  | 1.43  | -0.05 | 0.18 | 0.8  | 0.84 | No  |
| MMP14     | 11.26 | 11.44 | -0.18 | 0.17 | 0.35 | 0.64 | No  |
| MMP15     | 7.92  | 6.15  | 1.77  | 0.35 | 0.01 | 0.05 | Yes |
| MMP16     | 6.84  | 7.23  | -0.39 | 0.36 | 0.34 | 0.62 | No  |
| MMP17     | 4.72  | 4.26  | 0.46  | 0.33 | 0.23 | 0.54 | No  |
| MMP19     | 8.47  | 8.68  | -0.22 | 0.43 | 0.64 | 0.78 | No  |
| MMP2      | 13.22 | 11.29 | 1.93  | 0.36 | 0.01 | 0.05 | Yes |
| MMP20     | 1.33  | 1.64  | -0.31 | 0.3  | 0.37 | 0.65 | No  |
| MMP23A    | 3.07  | 4.12  | -1.06 | 0.5  | 0.1  | 0.33 | No  |
| MMP23B    | 2.99  | 2.13  | 0.86  | 0.49 | 0.15 | 0.43 | No  |
| MMP24     | 5.02  | 4.58  | 0.44  | 0.29 | 0.2  | 0.52 | No  |
| MMP24-AS1 | 10.51 | 10.03 | 0.49  | 0.07 | 0    | 0.03 | Yes |
| MMP25     | 3.63  | 3.09  | 0.54  | 0.43 | 0.27 | 0.56 | No  |
| MMP26     | 1.64  | 1.83  | -0.19 | 0.33 | 0.59 | 0.75 | No  |
| MMP27     | 2.32  | 1.84  | 0.48  | 1.12 | 0.69 | 0.8  | No  |
| MMP28     | 8.11  | 5.14  | 2.98  | 0.23 | 0    | 0.01 | Yes |
| MMP3      | 1.71  | 1.89  | -0.18 | 0.29 | 0.57 | 0.75 | No  |
| MMP7      | 2.13  | 2.81  | -0.69 | 0.51 | 0.25 | 0.56 | No  |
| MMP8      | 1.24  | 1.86  | -0.61 | 0.43 | 0.23 | 0.53 | No  |
| MMP9      | 2.46  | 2.54  | -0.07 | 0.63 | 0.91 | 0.88 | No  |
| NAGLU     | 8.68  | 8.56  | 0.12  | 0.14 | 0.43 | 0.67 | No  |
| NCAN      | 7.05  | 7.33  | -0.28 | 0.49 | 0.6  | 0.75 | No  |
| NDST1     | 10.93 | 11.2  | -0.27 | 0.12 | 0.09 | 0.31 | No  |
| NDST2     | 7.63  | 7.13  | 0.5   | 0.07 | 0    | 0.02 | Yes |
| NDST3     | 1.8   | 1.34  | 0.46  | 0.4  | 0.31 | 0.6  | No  |
| NDST4     | 2.24  | 2.37  | -0.13 | 0.53 | 0.82 | 0.84 | No  |
| NOS3      | 12.54 | 11.75 | 0.79  | 0.16 | 0.01 | 0.05 | Yes |
| NRP1      | 7.58  | 8.13  | -0.55 | 0.04 | 0    | 0.01 | Yes |
| NRP2      | 11.42 | 9.99  | 1.43  | 0.16 | 0    | 0.02 | Yes |
| NYX       | 6.08  | 6.28  | -0.19 | 0.43 | 0.68 | 0.79 | No  |

|                 |       |       |       |      |      |      |     |
|-----------------|-------|-------|-------|------|------|------|-----|
| <b>OGN</b>      | 1.15  | 1.18  | -0.03 | 0.08 | 0.72 | 0.82 | No  |
| <b>OMD</b>      | 1.75  | 1.3   | 0.45  | 0.4  | 0.32 | 0.61 | No  |
| <b>OPTC</b>     | 4.35  | 3.04  | 1.32  | 1.26 | 0.35 | 0.64 | No  |
| <b>P3H1</b>     | 8.82  | 8.55  | 0.27  | 0.19 | 0.22 | 0.53 | No  |
| <b>PODN</b>     | 2.54  | 2.67  | -0.13 | 0.54 | 0.82 | 0.85 | No  |
| <b>PODNL1</b>   | 3.05  | 2.69  | 0.36  | 0.61 | 0.59 | 0.75 | No  |
| <b>PRELP</b>    | 1.67  | 1.88  | -0.22 | 0.37 | 0.59 | 0.75 | No  |
| <b>PRG2</b>     | 5.71  | 5.79  | -0.08 | 0.31 | 0.8  | 0.84 | No  |
| <b>PRG3</b>     | 5.09  | 5.08  | 0.01  | 0.45 | 0.99 | 0.92 | No  |
| <b>PRG4</b>     | 5.47  | 5.73  | -0.26 | 0.18 | 0.22 | 0.53 | No  |
| <b>PTPRZ1</b>   | 1.41  | 1.57  | -0.17 | 0.26 | 0.56 | 0.75 | No  |
| <b>SDC1</b>     | 5.56  | 6.13  | -0.56 | 0.28 | 0.11 | 0.34 | No  |
| <b>SDC2</b>     | 5.2   | 5.46  | -0.26 | 0.46 | 0.6  | 0.75 | No  |
| <b>SDC3</b>     | 6.43  | 6.27  | 0.16  | 0.26 | 0.58 | 0.75 | No  |
| <b>SDC4</b>     | 8.33  | 8.77  | -0.44 | 0.22 | 0.12 | 0.35 | No  |
| <b>SERPINH1</b> | 11.57 | 10.52 | 1.06  | 0.06 | 0    | 0    | Yes |
| <b>SGSH</b>     | 3.05  | 2.58  | 0.47  | 0.99 | 0.66 | 0.79 | No  |
| <b>SPINT2</b>   | 7.75  | 5.87  | 1.88  | 0.42 | 0.01 | 0.07 | Yes |
| <b>SPOCK1</b>   | 12.17 | 12.52 | -0.35 | 0.27 | 0.26 | 0.56 | No  |
| <b>SPOCK2</b>   | 2.39  | 2.81  | -0.43 | 0.3  | 0.22 | 0.53 | No  |
| <b>SRGN</b>     | 13.04 | 12.84 | 0.19  | 0.16 | 0.29 | 0.59 | No  |
| <b>ST3GAL1</b>  | 8.63  | 8.06  | 0.57  | 0.16 | 0.02 | 0.11 | No  |
| <b>ST3GAL2</b>  | 5.05  | 4.66  | 0.4   | 0.27 | 0.21 | 0.52 | No  |
| <b>ST3GAL3</b>  | 6.02  | 6.33  | -0.31 | 0.1  | 0.03 | 0.14 | No  |
| <b>STAB2</b>    | 5.17  | 5.43  | -0.26 | 0.35 | 0.5  | 0.7  | No  |
| <b>SULF1</b>    | 10.46 | 5.79  | 4.66  | 0.45 | 0    | 0.01 | Yes |
| <b>SULF2</b>    | 10.73 | 9.12  | 1.61  | 0.23 | 0    | 0.03 | Yes |
| <b>TGFBR3</b>   | 8.36  | 7.62  | 0.74  | 0.23 | 0.03 | 0.14 | No  |
| <b>THBD</b>     | 10.54 | 7.97  | 2.57  | 0.22 | 0    | 0.01 | Yes |
| <b>TNXB</b>     | 1.29  | 1.24  | 0.05  | 0.24 | 0.84 | 0.85 | No  |
| <b>TSKU</b>     | 8.96  | 8.45  | 0.51  | 0.14 | 0.02 | 0.11 | No  |
| <b>UST</b>      | 5.78  | 5.73  | 0.05  | 0.23 | 0.83 | 0.85 | No  |
| <b>VCAM1</b>    | 2.56  | 3.23  | -0.67 | 0.86 | 0.48 | 0.69 | No  |
| <b>VCAN</b>     | 5.84  | 2.96  | 2.87  | 0.51 | 0    | 0.04 | Yes |
| <b>VEGFC</b>    | 8.56  | 9.83  | -1.27 | 0.18 | 0    | 0.03 | Yes |
| <b>WHAMMP1</b>  | 9.29  | 8.96  | 0.33  | 0.28 | 0.3  | 0.59 | No  |
| <b>WHAMMP3</b>  | 8.89  | 8.5   | 0.39  | 0.25 | 0.19 | 0.5  | No  |
| <b>XYLT1</b>    | 4.85  | 4.33  | 0.51  | 0.24 | 0.09 | 0.32 | No  |
| <b>XYLT2</b>    | 8.68  | 8.55  | 0.13  | 0.11 | 0.32 | 0.61 | No  |

## Supplementary figures

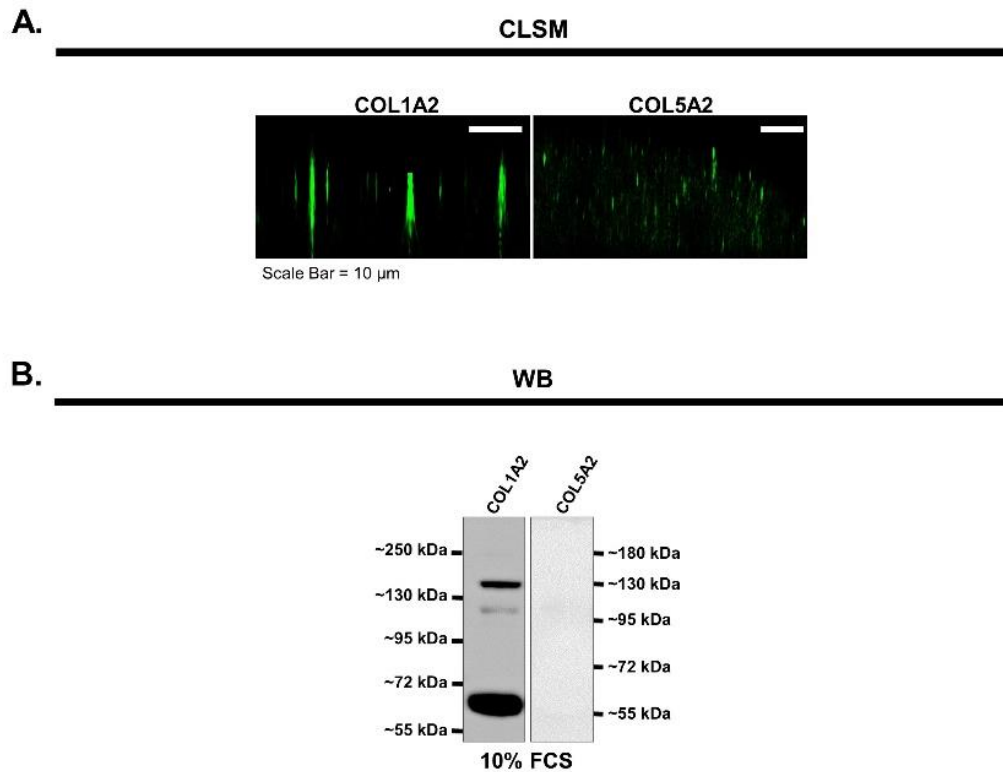

**Supplementary figure 1. Traces of COL1A2 and COL5A2 signal were detectable in fetal calf serum.** **A.** Orthogonal images depicting the signal distribution of COL1A2 and COL5A2 (green coloring) in cell culture media supplemented with 10% FCS on IbiTreat polymer coverslips processed by HPF/FS-RH and immunolabeled for CLSM analysis as described in the main text. **B.** Western blotting was used to analyze protein content of COL1A2 and COL5A2 in 10% FCS (method described in the main text).

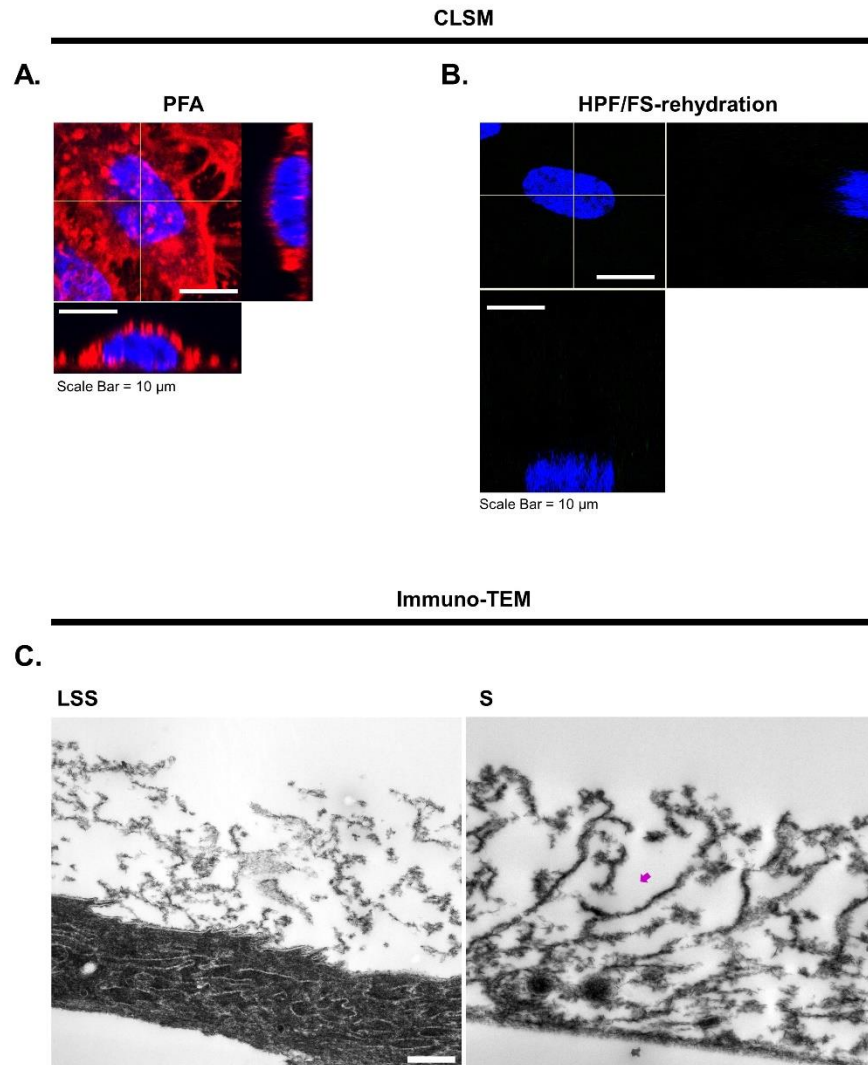

**Supplementary figure 2. Unspecific binding of secondary antibodies in the ESL was not detected by confocal laser scanning microscopy or transmission electron microscopy.** **A.** CLSM orthogonal image reconstruction shows formaldehyde fixed HUVECs labeled by Texas red-WGA (red) without primary antibodies incubation. Nuclei were labeled with DAPI (blue) **B.** HUVECs processed by HPF/FS. As a negative control, HUVECs were not incubated with primary antibodies. Blue coloring depicts the nuclei **C.** Immuno-EM of negative controls with omitted primary antibodies. Note the absence of immunoreactivity in the surface layer of LSS- and S-cultivated HUVECs, except single gold particle sporadically occurs (magenta thick arrow). Scale bar: c: 1000 nm.

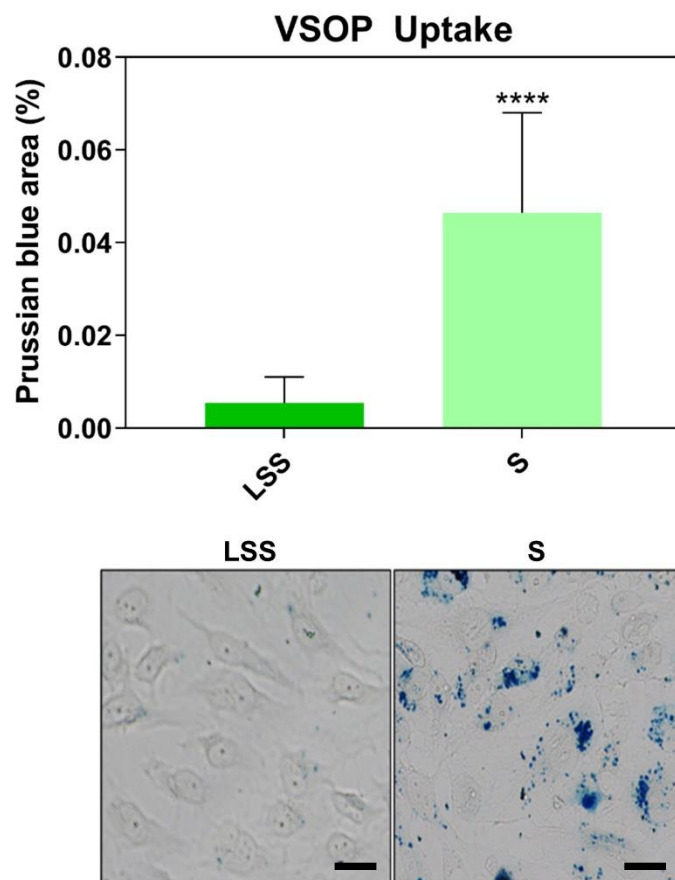

**Supplementary figure 3. LSS cultivation decreased the internalization of perfused VSOPs in HUVECs.** LSS- and S-cultivated HUVECs perfused with 0.75 mM VSOPs for 3 h, formaldehyde fixed and stained for Prussian blue. Graph depicts the quantification of the amount of Prussian blue stained area per ROI between LSS- and S-cultivated HUVECs. Images showing the amount of Prussian blue stained area in LSS- and S-cultivated HUVECs. Data are presented as mean  $\pm$  SD. \*\*\*\*P < 0.0001 vs. LSS by a ratio paired t-test. n = 9. Scale bar = 20  $\mu$ m.



**A.** **COL1A2**

---

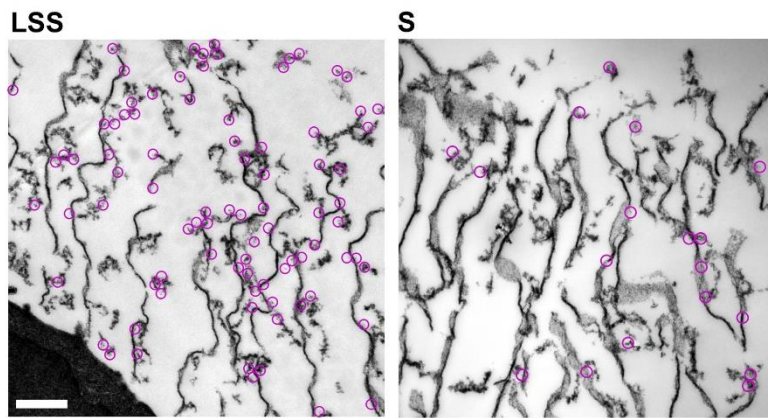

**B.** **COL5A2**

---

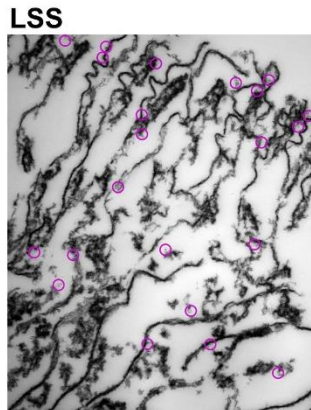

**Supplementary figure 4. Pre-embedding immunogold labeling for COL1A2 and COL5A2 in the surface layer of LSS- and S-cultured HUVECs. Magenta circles highlight clusters of gold-coupled antibodies in the ESL against A. COL1A2 and B. COL5A2. Scale bar = 1  $\mu$ m**

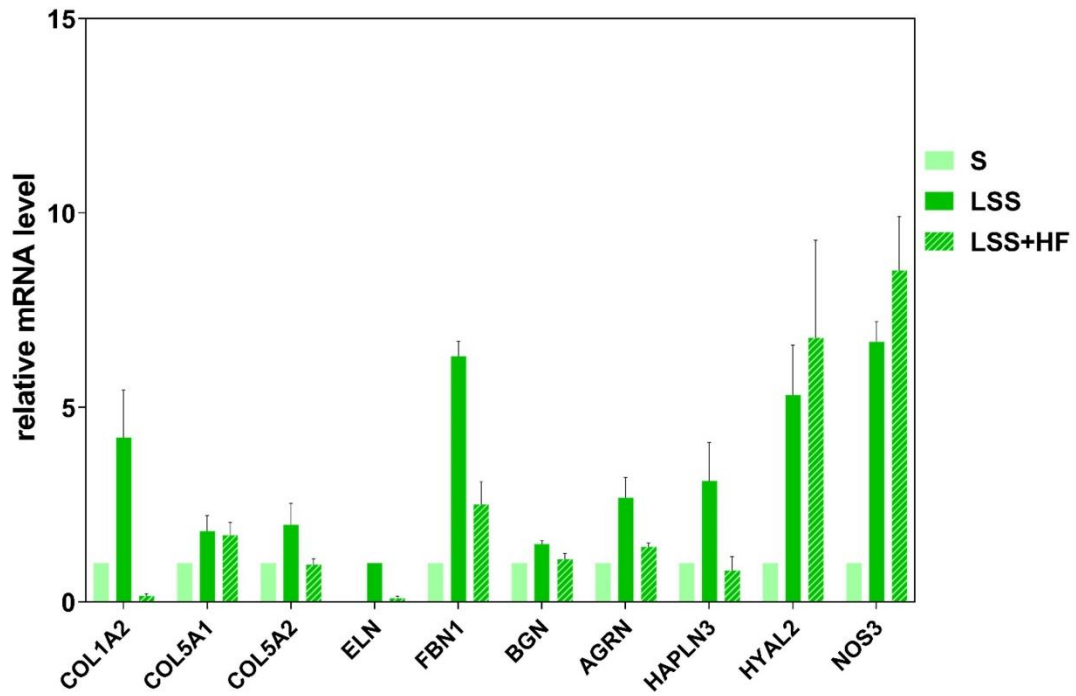

**Supplementary figure 5. Halofuginone lactate reduced the expression of extracellular matrix proteins in LSS-cultivated HUVECs.** Gene expression measured by RT-qPCR. Relative target gene expression was normalized to the housekeeping gene ACTB using the comparative  $\Delta\Delta C_t$  analysis ( $2^{-\Delta\Delta C_t}$ ). Data are presented as mean  $\pm$  SD. n=3.

## Supplementary video legends

**Supplementary video 1. CLSM 3D projection of LSS-cultivated HUVECs depicting the localization and labeling pattern of COL1A2 in the ESL.** HUVECs were processed by HPF/FS in culture media supplemented with 10% FCS. Green coloring shows COL1A2 labeling and blue nuclei. Bounding box: 100  $\mu\text{m}$ .

**Supplementary video 2. CLSM 3D projection of S-cultivated HUVECs depicting the localization and labeling pattern of COL1A2 in the ESL.** HUVECs were processed by HPF/FS in culture media supplemented with 10% FCS. Green coloring shows COL1A2 labeling and blue nuclei. Bounding box: 100  $\mu\text{m}$ .

**Supplementary video 3. CLSM 3D projection of LSS-cultivated HUVECs depicting the localization and labeling pattern of COL5A2 in the ESL.** HUVECs were processed by HPF/FS in culture media supplemented with 1% BSA. Green coloring shows COL5A2 labeling and blue nuclei. Bounding box: 100  $\mu\text{m}$ .

**Supplementary video 4. CLSM 3D projection of S-cultivated HUVECs depicting the localization and labeling pattern of COL5A2 in the ESL.** HUVECs were processed by HPF/FS in culture media supplemented with 1% BSA. Green coloring shows COL5A2 labeling and blue nuclei. Bounding box: 100  $\mu\text{m}$ .
